# Supplementary material for: Ab-Initio Spectroscopic Characterization of Melem-Based Graphitic Carbon Nitride Polymorphs
Source: MDPI journal article supplement (doi:10.3390/nano11071863), 2021-07-20
Supplement: s1 [file s1]

# Supplementary Materials: Ab-Initio Spectroscopic Characterization of Melem-Based Graphitic Carbon Nitride Polymorphs

Aldo Ugolotti  and Cristiana Di Valentin \* 

Dipartimento di Scienza dei Materiali, Università degli Studi di Milano-Bicocca, Via Cozzi 55, 20125 Milano, Italy

\* Correspondence: cristiana.divalentin@unimib.it

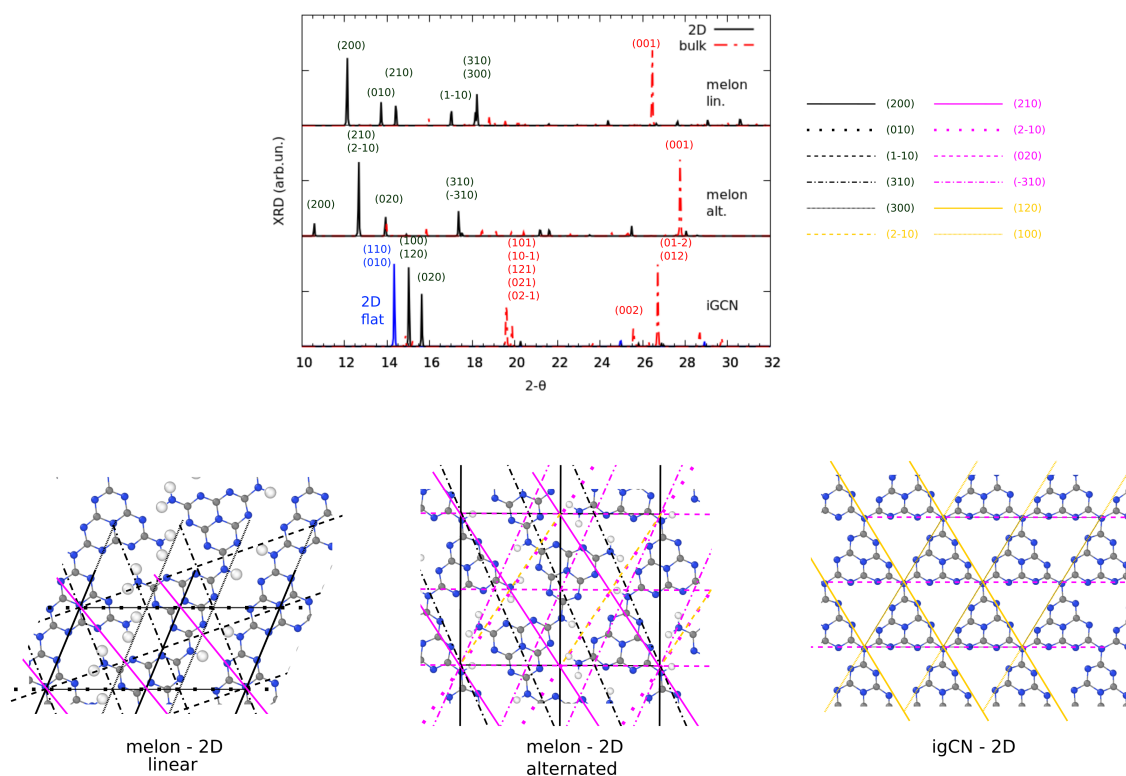

**Figure S1.** Representation of real space reflection planes associated with the main peaks reported in the XRD spectra of the 2D models.

**Table S1.** List of the optimized crystal parameters of the optimized unit cell of the periodic models.

| Model<br>Crystal parameter | Melon linear |         | Melon alternated |        | igCN   |        |
|----------------------------|--------------|---------|------------------|--------|--------|--------|
|                            | 2D           | bulk    | 2D               | bulk   | 2D     | bulk   |
| $ a $ (Å)                  | 15.80        | 15.70   | 16.72            | 16.67  | 13.80  | 13.86  |
| $ b $ (Å)                  | 6.98         | 7.00    | 12.71            | 12.70  | 13.31  | 13.55  |
| $ c $ (Å)                  | -            | 6.93    | -                | 4.66   | -      | 6.96   |
| $\theta(ab)$               | 67.46°       | 67.72°  | 90.03°           | 90.03° | 58.79° | 59.25° |
| $\theta(ac)$               | -            | 100.75° | -                | 51.55° | -      | 90.08° |
| $\theta(bc)$               | -            | 86.37°  | -                | 61.18° | -      | 90.08° |

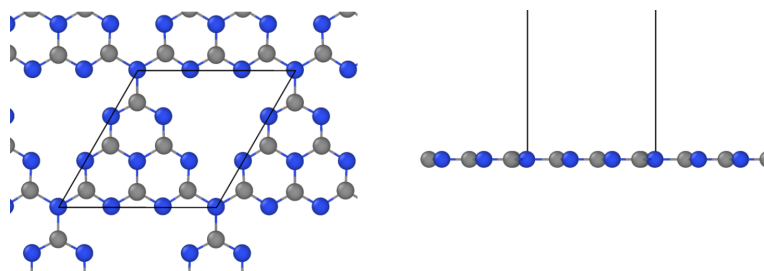

**Figure S2.** Top and left side view of the optimized structure of the alternative 2D gCN (flat) systems.

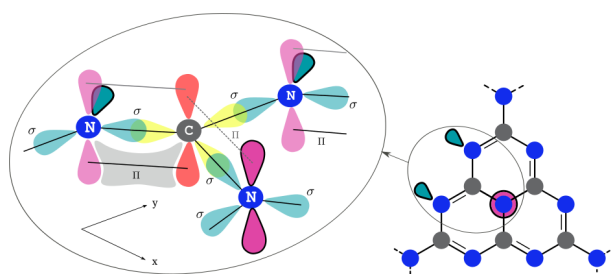

**Figure S3.** Sketch of a monomer of 2D igCN and its electronic structure in real space. The orbitals where the lone pair should be located are marked by a thicker black border. Red or purple lobes indicate the  $p_z$ -like orbitals of C or N, respectively. Yellow/light-blue report  $p_{x,y}$ -like orbitals on C/N.

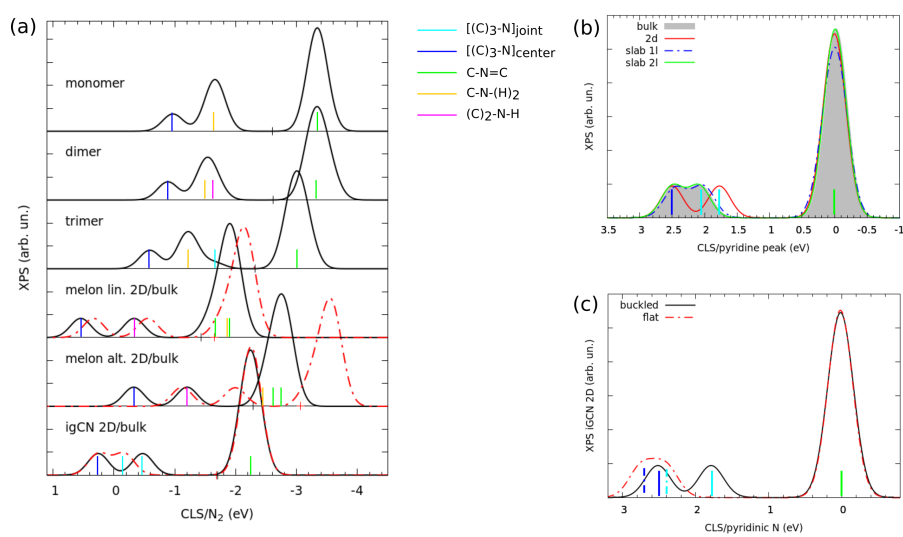

**Figure S4.** Comparison of simulated XPS spectra (a) including the relative chemical shift, calculated with the inclusion of one  $N_2$  molecule in the supercell, (b) of bulk/2D/slab igCN and (c) 2D igCN flat/distorted, reported using the average total energy of core-excited pyridinic N atoms as reference.

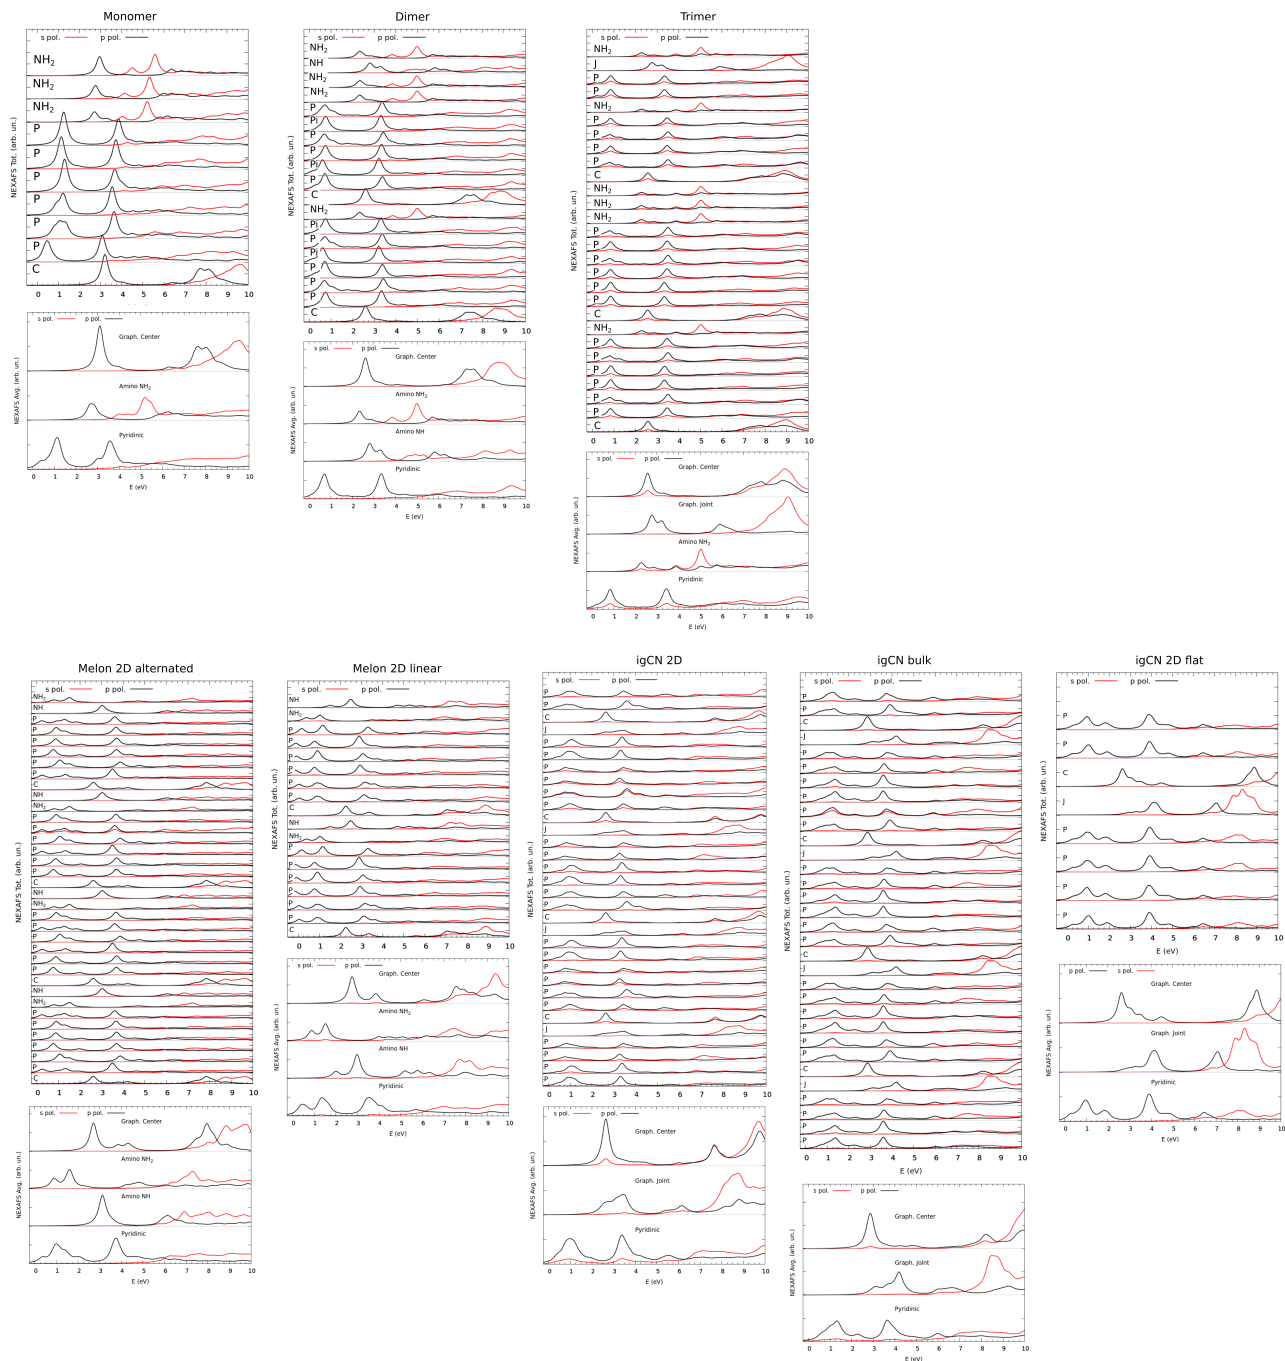

**Figure S5.** Detailed atomically resolved NEXAFS spectra for the different models, including both in-plane and out-of-plane polarizations. The lower panel show the spectra averaged over the atoms belonging the same N species. All the spectra have been aligned to the onset of the absorption.
